# Supplementary material
Source: PubMed Central journal article supplement (PMC3677962)
Supplement: NIHMS61976-supplement-si20070108_024.pdf [file NIHMS61976-supplement-si20070108_024.pdf]

## Supporting Information for

### **DNA-Encoded Antibody Libraries: A Unified Platform for Multiplexed Cell Sorting and Detection of Genes and Proteins**

Ryan C. Bailey<sup>1‡</sup>, Gabriel A. Kwong<sup>1</sup>, Caius G. Radu<sup>2</sup>, Owen N. Witte<sup>2,3†</sup> and James R. Heath<sup>1\*</sup>

NanoSystems Biology Cancer Center

<sup>1</sup> Division of Chemistry and Chemical Engineering, MC 127-72  
California Institute of Technology, Pasadena, CA 91125

<sup>2</sup> Department of Molecular and Medical Pharmacology

<sup>3</sup> Departments of Microbiology, Immunology, and Molecular Genetics

<sup>†</sup> Howard Hughes Medical Institute

University of California, Los Angeles, CA 90095

## COMPLETE REFERENCES

4. Tian, Q.; Stepaniants, S. B.; Mao, M.; Weng, L.; Feetham, M. C.; Doyle, M. J.; Yi, E. C.; Dai, H.; Thorsson, V.; Eng, J.; Goodlett, D.; Berger, J. P.; Gunter, B.; Linseley, P. S.; Stoughton, R. B.; Aebersold, R.; Collins, S. J.; Hanlon, W. A.; Hood, L. E. *Mol. Cell. Proteomics* **2004**, 3, 960-969.
7. Rich, J. N.; Reardon, D. A.; Peery, T.; Dowell, J. M.; Quinn, J. A.; Penne, K. L.; Wikstrand, C. J.; van Duyn, L. B.; Dancey, J. E.; McLendon, R. E.; Kao, J. C.; Stenzel, T. T.; Rasheed, B. K. A.; Tourt-Uhlig, S. E.; Herndon, J. E.; Vredenburgh, J. J.; Sampson, J. H.; Friedman, A. H.; Bigner, D. D.; Friedman, H. S. *J. Clin. Oncol.* **2004**, 22, 133-142.
8. Mellingshoff, I. K.; Wang, M. Y.; Vivanco, I.; Haas-Kogan, D. A.; Zhu, S.; Dia, E. Q.; Lu, K. V.; Yoshimoto, K.; Huang, J. H. Y.; Chute, D. J.; Riggs, B. L.; Horvath, S.; Liau, L. M.; Cavenee, W. K.; Rao, P. N.; Beroukhim, R.; Peck, T. C.; Lee, J. C.; Sellers, W. R.; Stokoe, D.; Prados, M.; Cloughesy, T. F.; Sawyers, C. L.; Mischel, P. S. *N. Engl. J. Med.* **2006**, 353, 2012-2024.
11. Lamb, J.; Crawford, E. D.; Peck, D.; Modell, J. W.; Blat, I. C.; Wrobel, M. J.; Lerner, J.; Brunet, J. P.; Subramanian, A.; Ross, K. N.; Reich, M.; Hieronymus, H.; Wei, G.; Armstrong, S. A.; Haggarty, S. J.; Clemons, P. A.; Wei, R.; Carr, S. A.; Lander, E. S.; Golub, T. R., *Science* **2006**, 313 (5795), 1929-1935.
